# Supplementary material for: High variability in migration and wintering strategies of brown skuas (Catharacta antarctica lonnbergi) in the Indian Ocean
Source: Springer Nature journal article supplement (doi:10.1007/s00300-017-2169-1), 2017-07-08
Supplement: MOESM1 [file 300_2017_2169_MOESM1_ESM_kd.pdf]

## **High variability in migration and wintering strategies of brown skuas**

### **(*Catharacta antarctica lonnbergi*) in the Indian Ocean**

KARINE DELORD<sup>1\*</sup>, YVES CHEREL<sup>1</sup>, CHRISTOPHE BARBRAUD<sup>1</sup>, OLIVIER

CHASTEL<sup>1</sup>, HENRI WEIMERSKIRCH<sup>1</sup>

<sup>1</sup> Centre d'Études Biologiques de Chizé, UMR 7372 du CNRS-Université de La Rochelle,  
79360 Villiers-en-Bois, France

Corresponding author:

Karine DELORD, CEBC-CNRS, 79 360 VILLIERS-EN-BOIS, FRANCE

E-mail: karine.delord@cebc.cnrs.fr

### **Electronic Supplementary Material**

**Fig. S1** Representative GLS tracks illustrating the two migratory movement modes of brown skuas (*Catharacta antarctica lonnbergi*) during the inter-breeding period: i) short-distance longitudinal movements within the sub-Antarctic and subtropical zones, ii) long-distance and mainly anticlockwise loop movements to subtropical (pink) or tropical zones (dark blue and purple) of two Crozet (green triangle) birds and three Kerguelen (red triangle) birds

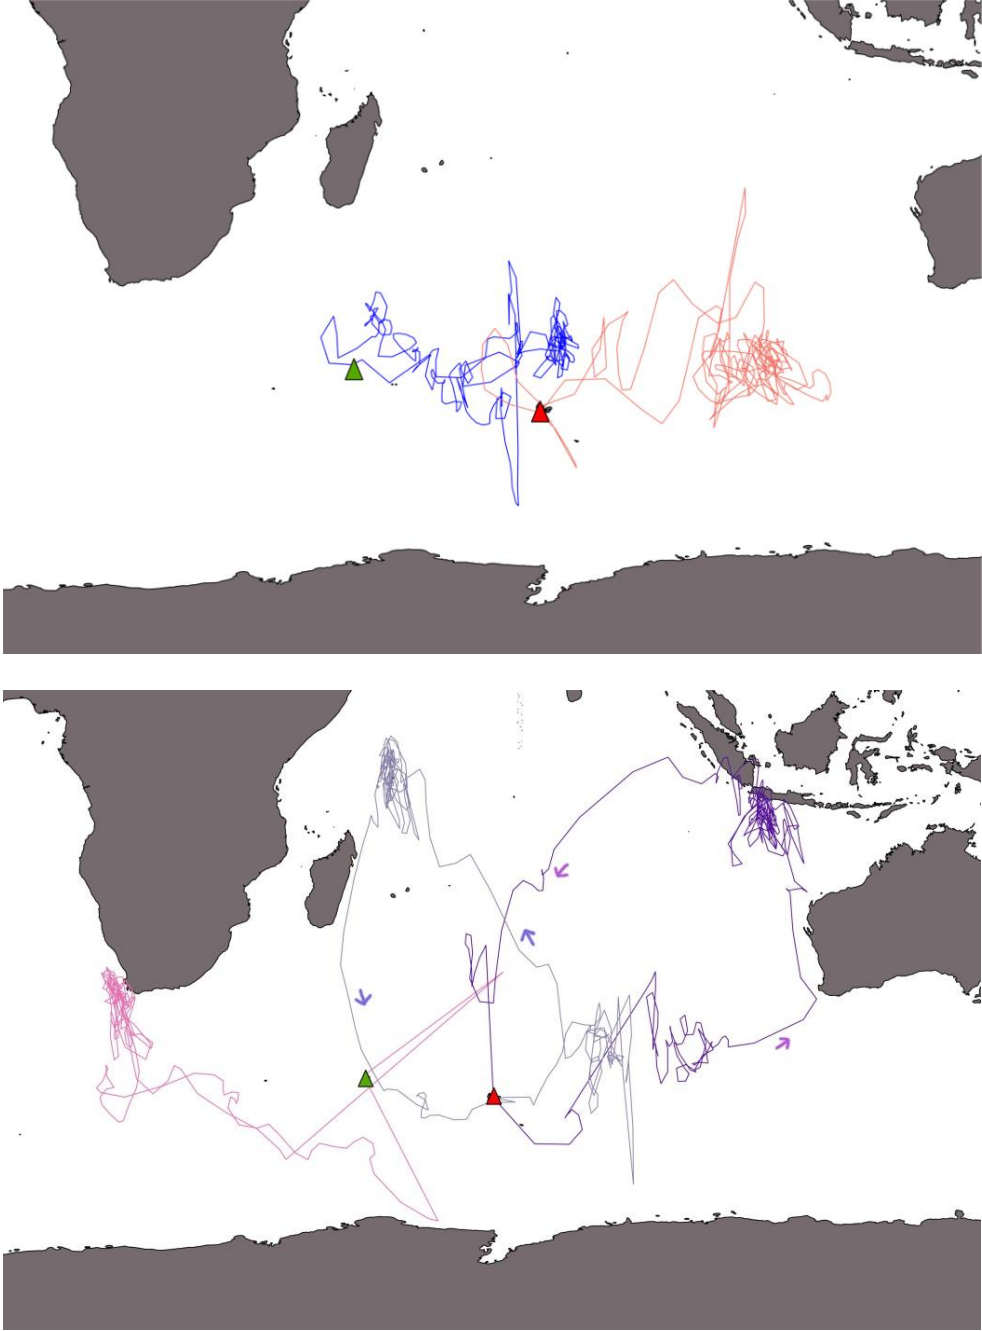

**Fig. S2**

a) Wintering location (centroids of 50% kernel UD) and b) body feather  $\delta^{15}\text{N}$  versus  $\delta^{13}\text{C}$  values of four pairs of brown skuas (*Catharacta antarctica lonnbergi*) from Kerguelen Islands. Males (squares) and females (circles) from the same pairs share the same colour. Isotopic values are means  $\pm$  SD

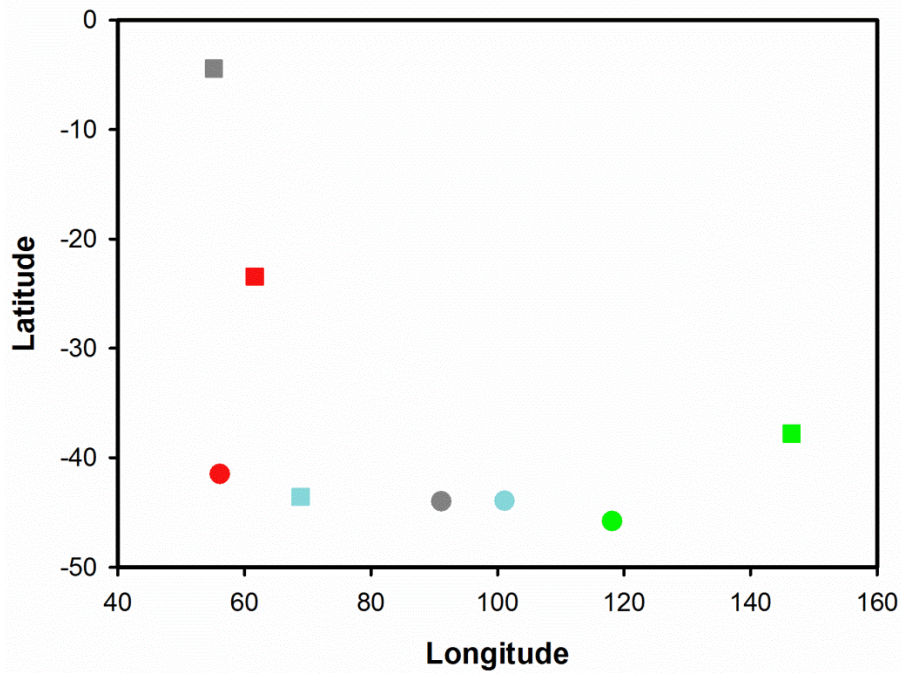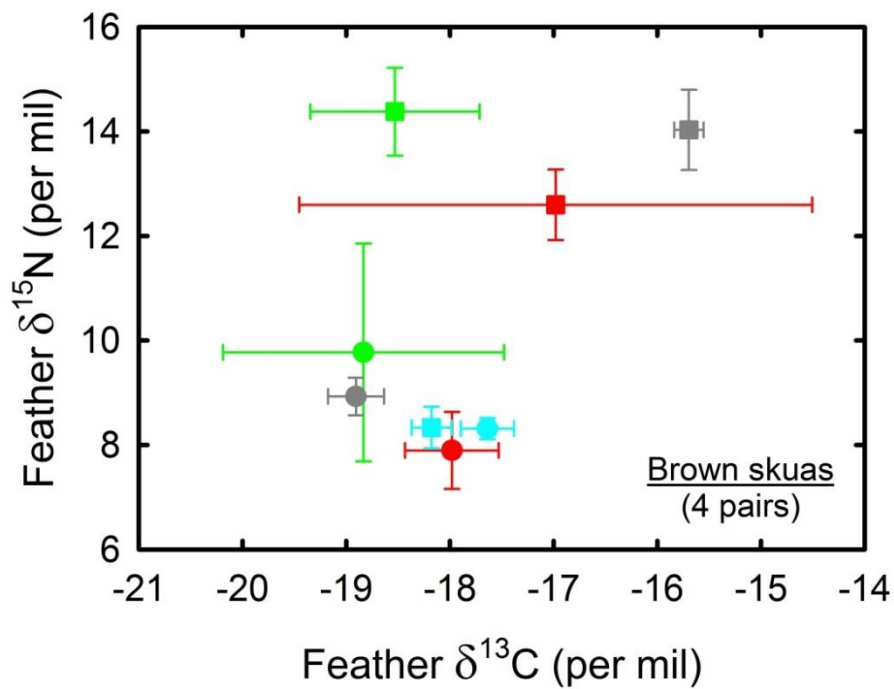

**Fig. S3**

Activity patterns (daily proportion of time spent on the water) during daytime (a) and during darkness (b) calculated from geolocator-immersion loggers for brown skuas (*Catharacta antarctica lonnbergi*) wintering in sub-Antarctic (black), subtropical (grey) and tropical areas (dark grey). Means are presented  $\pm$  SD

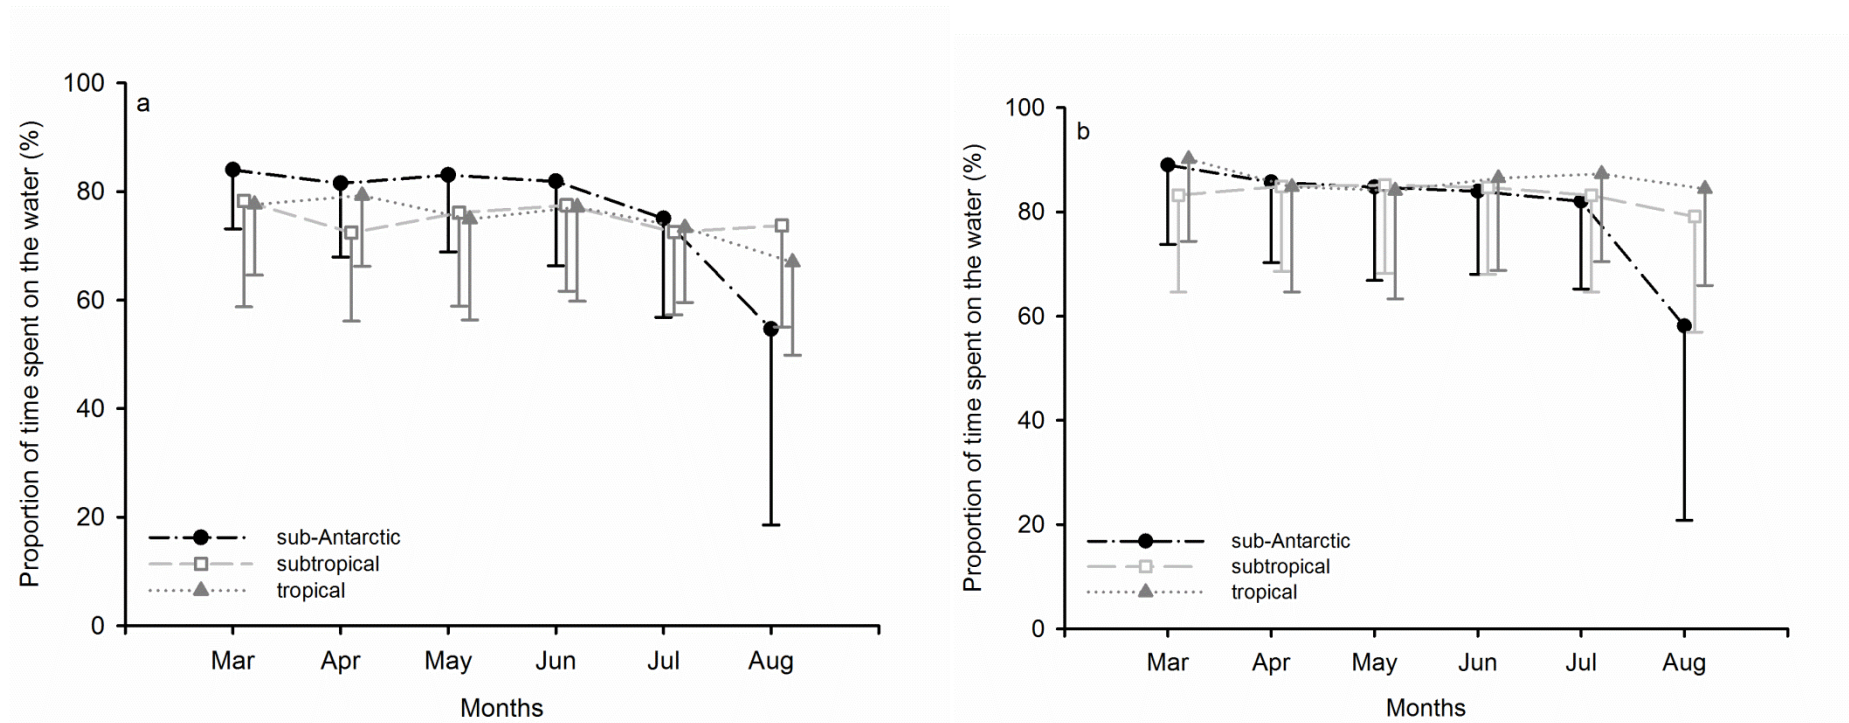

**Table S1** Fixed-effect parameter estimates of the generalized linear model describing variation of the migration pattern (departure date of outward migration) for brown skua (*Catharacta antarctica lonnbergi*) from French Southern Territories. The variable selected in the best model (see Table 3) and its reference value is female (SexF).

|                    | Value | Std. Error | t-value | p-value      |
|--------------------|-------|------------|---------|--------------|
| <b>(Intercept)</b> | 9,71  | 0,00       | 4496,03 | <b>0,000</b> |
| SexM               | 0,00  | 0,00       | 0,10    | 0,925        |

**Table S2** Fixed-effect parameter estimates of generalized linear model describing variation of the migration pattern (duration of outward migration) for brown skua (*Catharacta antarctica lonnbergi*) from French Southern Territories. Variables selected in the best model (see Table 3) and their reference values are female (SexF) and wintering area (sub-Antarctic).

|                                   | Value | Std. Error | t-value | p-value      |
|-----------------------------------|-------|------------|---------|--------------|
| <b>(Intercept)</b>                | 2,58  | 0,11       | 22,91   | <b>0,000</b> |
| <b>SexM</b>                       | -1,66 | 0,34       | -4,95   | <b>0,000</b> |
| <b>climatesubtropical</b>         | 0,60  | 0,14       | 4,14    | <b>0,000</b> |
| <b>climatetropical</b>            | 0,74  | 0,18       | 4,19    | <b>0,000</b> |
| <b>SexMolM:climatesubtropical</b> | 2,02  | 0,36       | 5,59    | <b>0,000</b> |
| SexMolM:climatetropical           | 0,71  | 0,39       | 1,83    | 0,067        |

**Table S3** Fixed-effect parameter estimates of a generalized linear model describing the variation of the migration pattern (arrival date of inward migration) for brown skua (*Catharacta antarctica lonnbergi*) from French Southern Territories. The variables selected in the best model (see Table 3) and its reference value is female (SexF).

|                    | Value | Std. Error | t-value | p-value |
|--------------------|-------|------------|---------|---------|
| <b>(Intercept)</b> | 9,72  | 0,00       | 4528,57 | 0,000   |
| SexM               | 0,00  | 0,00       | -0,13   | 0,893   |

**Table S4** Fixed-effect parameter estimates of a generalized linear model describing the variation of the migration pattern (duration of inward migration) for brown skua (*Catharacta antarctica lonnbergi*) from French Southern Territories. Variables selected in the best model (see Table 3) and their reference values are female (SexF) and wintering area (sub-Antarctic).

|                                   | Value | Std. Error | t-value | p-value      |
|-----------------------------------|-------|------------|---------|--------------|
| <b>(Intercept)</b>                | 2,55  | 0,11       | 22,39   | <b>0,000</b> |
| <b>SexM</b>                       | -0,72 | 0,23       | -3,13   | <b>0,002</b> |
| <b>climatesubtropical</b>         | 0,60  | 0,15       | 4,09    | <b>0,000</b> |
| <b>climatetropical</b>            | 0,73  | 0,18       | 4,06    | <b>0,000</b> |
| <b>SexMolM:climatesubtropical</b> | 0,61  | 0,28       | 2,20    | <b>0,028</b> |
| SexMolM:climatetropical           | 0,29  | 0,29       | 0,99    | 0,320        |

**Table S5** Fixed-effect parameter estimates of a linear mixed-effect model of the variation of the activity pattern (mean daily proportion of time spent on the water during daytime) for brown skua (*Catharacta antarctica lonnbergi*) from French Southern Territories. Variables selected in the best model (see Table 4) and their reference values are March (month3) and wintering area (sub-Antarctic).

|                                  | Value | Std. Error | t-value | p-value      |
|----------------------------------|-------|------------|---------|--------------|
| <b>(Intercept)</b>               | 1,18  | 0,03       | 35,95   | <b>0,000</b> |
| <b>month4</b>                    | -0,04 | 0,02       | -2,00   | <b>0,046</b> |
| month5                           | -0,02 | 0,02       | -1,09   | 0,276        |
| month6                           | -0,03 | 0,02       | -1,29   | 0,198        |
| <b>month7</b>                    | -0,11 | 0,02       | -5,77   | <b>0,000</b> |
| <b>month8</b>                    | -0,43 | 0,02       | -18,34  | <b>0,000</b> |
| climatesubtropical               | -0,04 | 0,05       | -0,71   | 0,487        |
| climatetropical                  | -0,08 | 0,05       | -1,59   | 0,128        |
| month4:climatesubtropical        | -0,02 | 0,03       | -0,64   | 0,524        |
| month5:climatesubtropical        | -0,03 | 0,03       | -0,79   | 0,429        |
| month6:climatesubtropical        | 0,01  | 0,03       | 0,18    | 0,855        |
| month7:climatesubtropical        | 0,02  | 0,03       | 0,56    | 0,572        |
| <b>month8:climatesubtropical</b> | 0,37  | 0,04       | 10,32   | <b>0,000</b> |
| month4:climatetropical           | 0,06  | 0,03       | 1,84    | 0,066        |
| month5:climatetropical           | 0,00  | 0,03       | -0,01   | 0,990        |
| month6:climatetropical           | 0,04  | 0,03       | 1,30    | 0,194        |
| month7:climatetropical           | 0,06  | 0,03       | 1,90    | 0,057        |
| <b>month8:climatetropical</b>    | 0,30  | 0,04       | 7,83    | <b>0,000</b> |

**Table S6** Fixed-effect parameter estimates of a linear mixed-effect model of the variation of the activity pattern (mean daily proportion of time spent on the water during darkness) for brown skua (*Catharacta antarctica lonnbergi*) from French Southern Territories. Variables selected in the best model (see Table 4) and their reference values are March (month3) and wintering area (sub-Antarctic).

|                                  | Value | Std. Error | t-value | p-value      |
|----------------------------------|-------|------------|---------|--------------|
| <b>(Intercept)</b>               | 1,30  | 0,04       | 33,00   | <b>0,000</b> |
| month4                           | -0,04 | 0,02       | -1,53   | 0,125        |
| month5                           | -0,04 | 0,02       | -1,46   | 0,145        |
| month6                           | -0,04 | 0,02       | -1,79   | 0,073        |
| <b>month7</b>                    | -0,09 | 0,02       | -3,49   | <b>0,001</b> |
| <b>month8</b>                    | -0,47 | 0,03       | -16,13  | <b>0,000</b> |
| climatesubtropical               | 0,00  | 0,06       | 0,01    | 0,989        |
| climatetropical                  | 0,02  | 0,06       | 0,25    | 0,806        |
| month4:climatesubtropical        | -0,03 | 0,04       | -0,73   | 0,464        |
| month5:climatesubtropical        | 0,00  | 0,04       | 0,06    | 0,953        |
| month6:climatesubtropical        | 0,00  | 0,04       | -0,04   | 0,972        |
| month7:climatesubtropical        | 0,01  | 0,04       | 0,25    | 0,801        |
| <b>month8:climatesubtropical</b> | 0,35  | 0,04       | 7,88    | <b>0,000</b> |
| month4:climatetropical           | -0,04 | 0,04       | -0,88   | 0,380        |
| month5:climatetropical           | -0,05 | 0,04       | -1,19   | 0,232        |
| month6:climatetropical           | 0,00  | 0,04       | 0,07    | 0,942        |
| month7:climatetropical           | 0,05  | 0,04       | 1,19    | 0,235        |
| <b>month8:climatetropical</b>    | 0,37  | 0,05       | 7,83    | <b>0,000</b> |



**Table S7** Phenology of brown skuas (*Catharacta antarctica lonnbergi*) and their main prey species at the French Southern Territories

| Prey species                           |                    | Sept          | Oct           | Nov           | Dec           | Jan           | Feb           | Mar           | Apr                  | May       | Jun       | Jul       | Aug       |
|----------------------------------------|--------------------|---------------|---------------|---------------|---------------|---------------|---------------|---------------|----------------------|-----------|-----------|-----------|-----------|
| <i>Aptenodytes patagonicus</i>         | King Penguin       | _ _ _ _ _     | v v v v v     | o v o v o v o | x o x o x o x | x o x o x o x | x x x x x x x | x x x x x x x | _ _ _ _ _            | _ _ _ _ _ | _ _ _ _ _ | _ _ _ _ _ | _ _ _ _ _ |
| <i>Eudyptes chrysolophus</i>           | Macaroni penguin   |               | _ _ _         | o o _ _ _     | x x _ _ _     | _ _ _ _ _     | _ _ _ _ _     | v             | <i>Moult</i>         |           |           |           |           |
| <i>Eudyptes chrysocome</i>             | Rockhopper penguin |               |               | _ _ _         | o o _ _ _     | x x _ _ _     | _ _ _ _ _     | v v           | _ _ _ _ _            | _ _ _ _ _ | _ _ _ _ _ | _ _ _ _ _ | _ _ _ _ _ |
| <i>Pygoscelis papua</i>                | Gentoo penguin     | o x o x o x o | x o x o x o x | o v v x v v v | v v v v v v v | _ _ _ _ _     | _ _ _ _ _     | _ _ _ _ _     | _ _ _ _ _            | _ _ _ _ _ | _ _ _ _ _ | o o o o o | x o x     |
| <i>Pachyptila belcheri</i>             | Thin-billed prion  | _ _ _ _ _     | _ _ _ _ _     | o o _ _ _     | x x x _ _ _   | _ _ _ _ _     | _ _ _ _ _     | v v           | _ _ _ _ _            | _ _ _ _ _ | _ _ _ _ _ | _ _ _ _ _ | _ _ _ _ _ |
| <i>Halobaena caerulea</i>              | Blue petrel        | _ _ _ _ _     | o o o _ _ _   | x x x _ _ _   | v v           | _ _ _ _ _     | _ _ _ _ _     | _ _ _ _ _     | <i>Post-breeding</i> |           |           |           |           |
| <i>Catharacta antarctica lonnbergi</i> | Brown skua         | _ _ _ _ _     | o o o o o     | _ _ x x x     | _ _ _ _ _     | v v v v v v v | _ _ _ _ _     | _ _ _ _ _     | _ _ _ _ _            | _ _ _ _ _ | _ _ _ _ _ | _ _ _ _ _ | _ _       |

Phenology periods: o: laying; x : hatching; v : fledging; \_ : presence on land or at colony
